# Supplementary material
Source: Springer Nature journal article supplement (https://www.springermedizin.de/resource/supplementary/12874_2008_306_MOESM7_ESM.pdf/9434202)

a

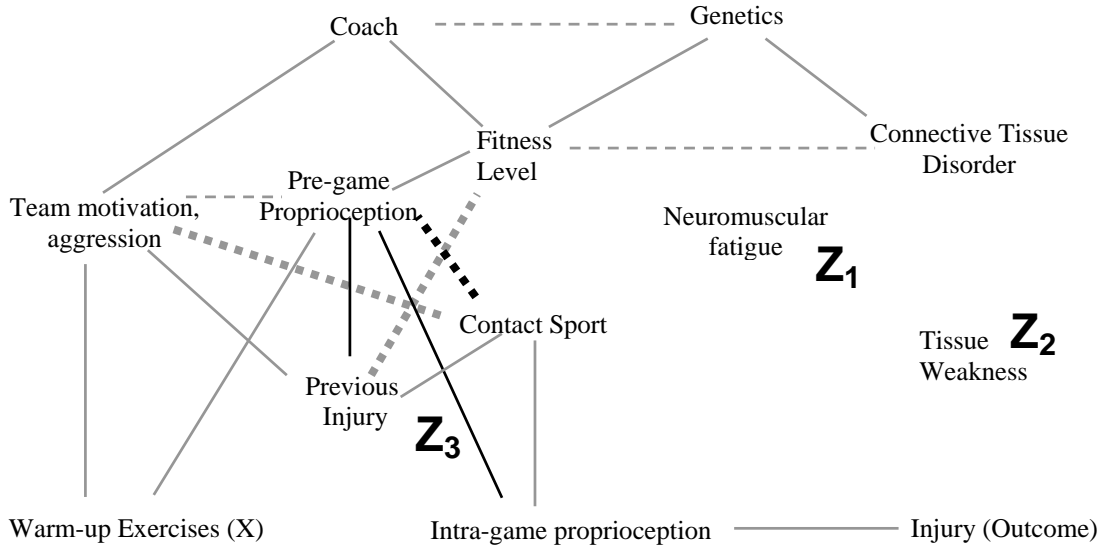

b

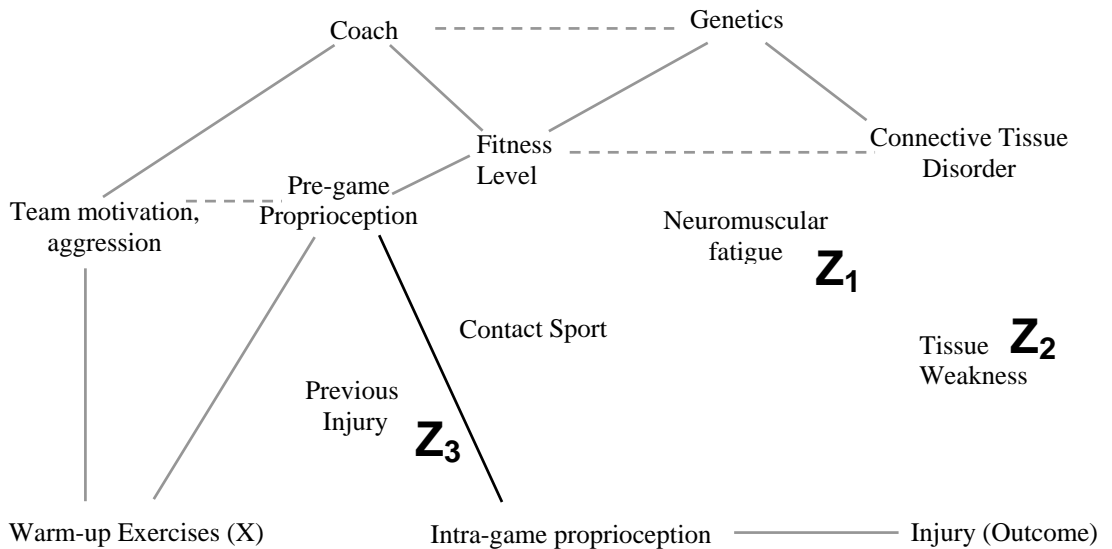

Supplement: MOESM7 [file 9434202]
